# Supplementary material for: IL-23R and IL-17A polymorphisms correlate with susceptibility of ankylosing spondylitis in a Southwest Chinese population
Source: PubMed Central journal article supplement (PMC5642556; doi:10.18632/oncotarget.20319), 2017-08-18
Supplement: oncotarget-08-70310-s001.pdf [file oncotarget-08-70310-s001.pdf]

## IL-23R and IL-17A polymorphisms correlate with susceptibility of ankylosing spondylitis in a Southwest Chinese population

### SUPPLEMENTARY MATERIALS

**Supplementary Table 1: Sequences of primers used for systematic search for SNPs in IL-23R and IL-17A**

| SNP                       | Forward primer (5'→3')  | Reverse primer (5'→3')    |
|---------------------------|-------------------------|---------------------------|
| <b>rs6693831 (C&gt;T)</b> | GCGGTAGTTACGGTCACCTTG   | GAGAACCACCCTAGCAGTGAAAC   |
| <b>rs7517847 (G&gt;T)</b> | TCCCTTCATACCTACCATCTCAC | GAATTTGAGGGGCCTAGGAGAC    |
| <b>rs1884444 (G&gt;T)</b> | CAACAGTCTTTTCTGCTTCCA   | CGATACATAAAACACCATACCTCAT |
| <b>rs10889677(C&gt;A)</b> | GTGACATTCTGTGCTCCTACCAT | ACCATGAAGCATGTTCCACCTT    |

Abbreviations: OR, odds ratio; CI, confidence interval

Significant *p*-values (< 0.05) are highlighted in bold
